# Supplementary material for: The response of sulfur dioxygenase to sulfide in the body wall of Urechis unincinctus
Source: PeerJ. 2019 Feb 22;7:e6544. doi: 10.7717/peerj.6544 (PMC6388664; doi:10.7717/peerj.6544)
Supplement: Supplemental Information 1 [file peerj-07-6544-s001.xls]

## Sheet: Sheet1
control						50 μM group						150 μM group
	A	B	C	D			A	B	C	D			A	B	C	D
0 h	1.03977	0.808414	1.18967	1.01262		0 h	1.03977	0.808414	1.18967	1.01262		0 h	1.03977	0.808414	1.18967	1.01262
6 h	1.12922	1.12972	1.18502	1.07141		6 h	1.10043	0.913082	0.941041	0.809611		6 h	1.24625	0.978482	1.02258	1.08244
24 h	1.26573	0.760077	1.25311	1.09297		24 h	0.818138	1.15482	1.22975	0.738959		24 h	1.19976	1.10091	0.99127	1.23941
48 h	0.628906	1.70269	1.19803	0.826002		48 h	1.24662	0.928495	1.10756	1.06756		48 h	1.89345	1.79766	1.96512	1.88541
72 h	1.17958	0.968831	1.10654	1.17122		72 h	1.24653	1.02372	0.718279	1.10636		72 h	2.36283	1.90029	2.33541	2.13156
