# Supplementary material for: The response of sulfur dioxygenase to sulfide in the body wall of Urechis unincinctus
Source: PeerJ. 2019 Feb 22;7:e6544. doi: 10.7717/peerj.6544 (PMC6388664; doi:10.7717/peerj.6544)
Supplement: Supplemental Information 2 [file peerj-07-6544-s002.xls]

## Sheet: Sheet1
control						50 μM group						150 μM group
	A	B	C	D			A	B	C	D			A	B	C	D
0 h	1.10277	1.30386	0.889301	1.11514		0 h	1.10277	1.30386	0.889301	1.11514		0 h	1.10277	1.30386	0.889301	1.11514
6 h	1.07765	1.00687	1.09825	1.12783		6 h	0.963306	1.04836	0.664899	1.17666		6 h	0.954889	0.908679	1.04141	0.914578
24 h	1.24928	1.34669	1.27733	1.12383		24 h	1.55046	1.48442	0.947268	1.32738		24 h	1.42392	1.37573	1.42874	1.46728
48 h	1.23017	1.32669	1.31493	1.04889		48 h	1.13979	1.06554	1.31087	1.17207		48 h	1.83533	1.50749	1.72334	1.8272
72 h	1.20407	1.48692	1.0643	1.06099		72 h	1.67526	1.54086	1.58698	1.36034		72 h	2.38857	2.03059	2.0768	2.16532
