# Supplementary material for: The response of sulfur dioxygenase to sulfide in the body wall of Urechis unincinctus
Source: PeerJ. 2019 Feb 22;7:e6544. doi: 10.7717/peerj.6544 (PMC6388664; doi:10.7717/peerj.6544)
Supplement: Supplemental Information 3 [file peerj-07-6544-s003.xls]

## Sheet: Sheet1
control								50 μM group								150 μM group
	A	B	C	D	E	F			A	B	C	D	E	F		A	B	C	D	E	F
0 h	0.110924	0.0973306	0.0985626	0.0739004	0.0846888	0.0950622		0 h	0.110924	0.0973306	0.0985626	0.0739004	0.0846888	0.0950622		0.110924	0.0973306	0.0985626	0.0739004	0.0846888	0.0950622
6 h	0.0958586	0.0872727	0.0890404	0.089834	0.0867696	0.0902285		6 h	0.158355	0.154023	0.156984	0.103607	0.100893	0.104285		0.114	0.11287	0.113201	0.101541	0.0967117	0.104972
24 h	0.103148	0.09726	0.091934	0.0922988	0.0967078	0.102219		24 h	0.139473	0.154522	0.149706	0.12909	0.127306	0.127788		0.124774	0.12287	0.123201	0.0987234	0.0982174	0.0970673
48 h	0.0863612	0.0927462	0.096269	0.0992794	0.0841509	0.0810782		48 h	0.12219	0.1103	0.116714	0.163667	0.176456	0.145288		0.158108	0.166284	0.164932	0.155645	0.155435	0.152485
72 h	0.0865272	0.0812831	0.0802231	0.0919632	0.0939877	0.093681		72 h	0.123942	0.122548	0.119808	0.157492	0.15458	0.15183		0.203061	0.207972	0.20242	0.209061	0.201971	0.21242
